# Supplementary material
Source: publisher figshare collection journal article supplement (https://frontiersin.figshare.com/ndownloader/files/21551937)
Supplement: Supplementary file [file 21551937]

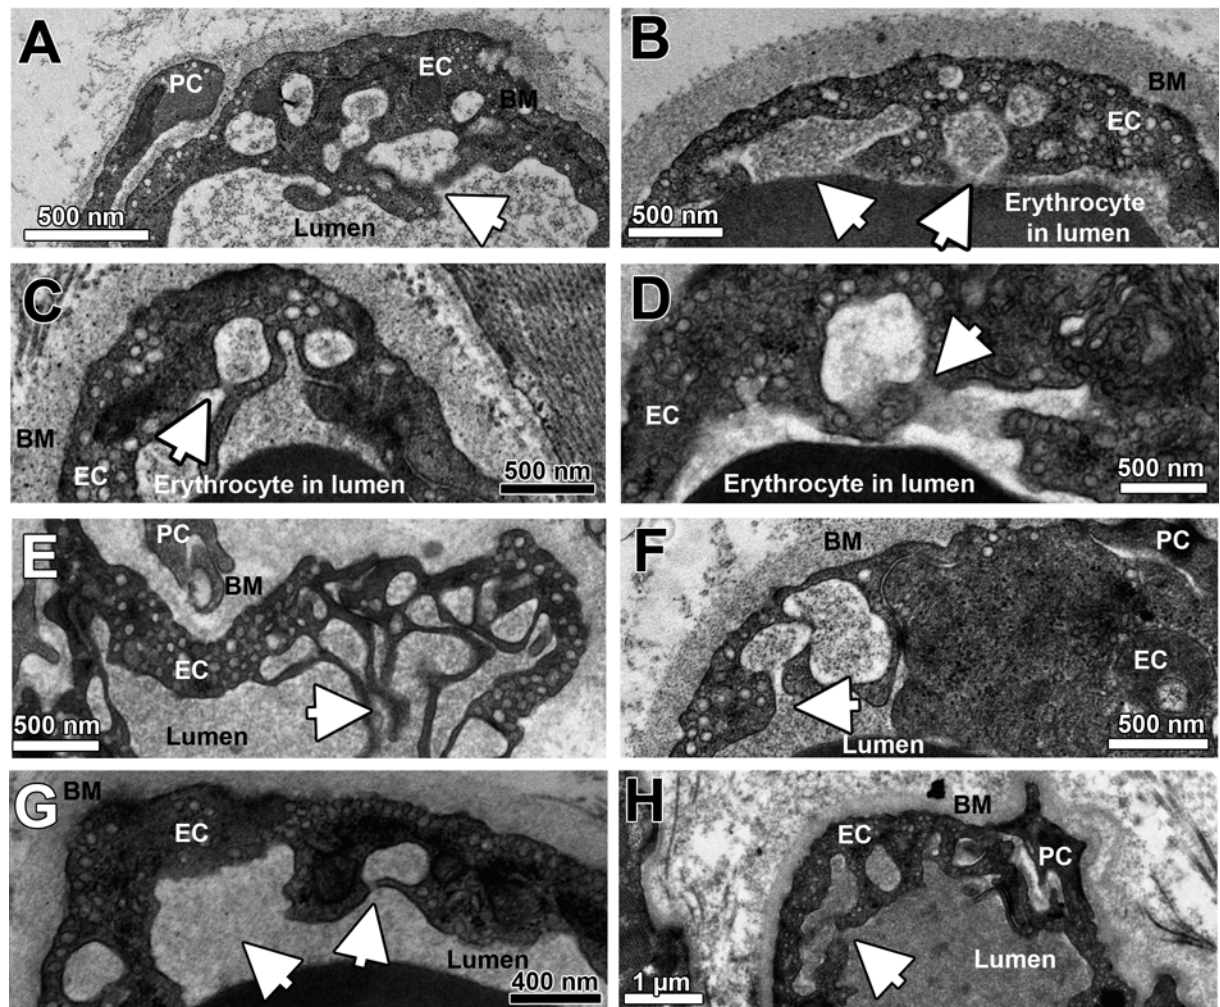

**Supplementary Figure 1: Further examples of EC sockets merging into the capillary lumen.** The white arrows indicate the presumed opening into the lumen.
